# Supplementary material for: N-Glycoproteome of E14.Tg2a Mouse Embryonic Stem Cells
Source: PLoS One. 2013 Feb 6;8(2):e55722. doi: 10.1371/journal.pone.0055722 (PMC3565968; doi:10.1371/journal.pone.0055722)
Supplement: Table S5 — List of identified N-glycoproteins based on their number of N-glycosylation. (XLSX) [file pone.0055722.s005.xlsx]

## Sheet: 1 N-glycan
gene symble	gene ID	total spectra counts	quantity grade	TMHMM-TM-mouse
Megf8	269878	5	medium	2
Herc1	235439	3	low	0
Xirp2	241431	8	medium	0
Tmem131	56030	2	low	2
L1cam	16728	4	low	1
Itpr1	16438	7	medium	6
Ntrk2	18212	2	low	2
Il6st	16195	7	medium	1
Atm	11920	2	low	0
Arid1a	93760	2	low	0
Ptprs	19280	2	low	2
Lphn1	330814	2	low	8
Slc12a7	20499	4	low	11
B4galt6	56386	4	low	1
Ror2	26564	10	medium	1
Adam9	11502	2	low	1
Gpr56	14766	3	low	7
H60b	667281	6	medium	1
Itgb5	16419	2	low	1
Tsga10	211484	2	low	0
Xpnpep2	170745	2	low	0
Ltbp1	268977	2	low	0
Punc	19289	3	low	1
Erap1	80898	3	low	0
Edem3	66967	15	high	1
Cd47	16423	20	high	5
Epha4	13838	2	low	1
Dpp7	83768	2	low	0
Tmem87b	72477	3	low	6
Zfp687	78266	4	low	0
Stt3b	68292	5	medium	10
Ctsf	56464	8	medium	0
ORF61	216157	9	medium	4
Slc38a4	69354	11	medium	11
Eng	13805	16	high	1
Cr1l	12946	20	high	1
Clptm1	56457	23	high	5
Trpv1	193034	2	low	6
Bmp1	12153	2	low	0
Sema3e	20349	2	low	0
Pcdhga10	93722	2	low	1
Osbp	76303	2	low	0
Vnn1	22361	2	low	0
Esam1	69524	3	low	1
Pcdhga6	93714	3	low	1
Pcdhgb5	93702	4	low	1
1300012G16Rik	71772	6	medium	1
Ephb2	13844	8	medium	1
Eef2	13629	9	medium	0
Procr	19124	10	medium	1
Tpp1	12751	10	medium	0
Tmem87a	211499	15	high	7
Tll1	21892	15	high	0
Tmem106b	71900	23	high	1
Extl3	54616	2	low	1
Pole	18973	2	low	0
B3gnt5	108105	2	low	1
Stau1	20853	2	low	0
Loxl2	94352	2	low	0
Ldlr	16835	3	low	1
Mcoln1	94178	3	low	6
Pigt	78928	3	low	1
Mier1	71148	3	low	0
Bst1	12182	3	low	1
Cercam	99151	3	low	0
Tmem16f	105722	4	low	8
Tex101	56746	4	low	0
Tm9sf1	74140	5	medium	9
Csf1	12977	5	medium	1
Tacstd2	56753	6	medium	1
Napsa	16541	7	medium	0
Bcam	57278	8	medium	1
Tor1aip2	240832	9	medium	0
Kirrel	170643	10	medium	1
Stim1	20866	10	medium	1
Cdh1	12550	11	medium	1
Hsp90ab1	15516	14	high	0
Raet1d	56554	14	high	1
Hsp90aa1	15519	19	high	0
Thy1	21838	19	high	0
Sypl	19027	52	high	4
Lrfn1	80749	2	low	1
Emp1	13730	2	low	4
Nptxr	73340	2	low	0
Ttyh3	78339	3	low	5
Rnf13	24017	3	low	1
Ube3a	22215	3	low	0
Fstl1	14314	3	low	0
H2-L	14980	3	low	0
Psmc5	19184	3	low	0
C230096C10Rik	230866	4	low	1
Trim28	21849	4	low	0
Txndc10	67988	5	medium	1
Ahsg	11625	5	medium	0
Glt8d3	223827	5	medium	1
Tulp1	22157	5	medium	0
Slc45a4	106068	6	medium	12
Ktelc1	224143	6	medium	0
Gla	11605	7	medium	1
Lepre1	56401	7	medium	0
Clcn2	12724	8	medium	11
Ugcgl1	320011	9	medium	0
Tuba3a	22144	11	medium	0
Golm1	105348	15	high	1
Slc29a1	63959	19	high	10
Slc44a1	100434	22	high	9
Glt25d1	234407	24	high	0
Cmklr1	14747	2	low	7
Slc7a3	11989	2	low	14
Tnfsf11	21943	2	low	1
Ncln	103425	2	low	2
Tmem110	69179	2	low	5
Emd	13726	2	low	1
Os9	216440	2	low	1
Trap1	68015	2	low	0
Hmgb1l	625781	2	low	0
Gpc1	14733	2	low	0
Lyar	17089	2	low	0
Gpr107	277463	3	low	7
Gart	14450	3	low	0
Tect1	654470	3	low	0
Tspan13	66109	4	low	4
Spag1	26942	4	low	0
Minpp1	17330	5	medium	0
Rpn1	103963	6	medium	1
Rap1gap	110351	6	medium	0
Kdelc1	72050	6	medium	0
Pigs	276846	7	medium	2
Gdf3	14562	7	medium	0
Eno1	13806	8	medium	0
Olfr535	258956	8	medium	5
Ppap2c	50784	9	medium	6
Hs2st1	23908	9	medium	0
Nradd	67169	10	medium	1
Mpzl2	14012	11	medium	1
Slc19a2	116914	12	medium	10
Prnp	19122	12	medium	2
P4ha1	18451	15	high	0
Tm9sf3	107358	17	high	9
Ssr2	66256	17	high	1
Epha2	13836	18	high	1
Eef1a1	13627	27	high	0
Ctsd	13033	31	high	1
Ctsl	13039	52	high	0
Bst2	69550	65	high	1
Slc2a1	20525	91	high	12
Slc2a3	20527	150	high	10
Rars	104458	2	low	0
2310044H10Rik	69683	2	low	1
Gm2a	14667	2	low	0
Impad1	242291	3	low	1
Man1a2	17156	3	low	1
Vsig8	240916	3	low	1
H2-M5	240095	3	low	2
Tmed4	103694	4	low	2
Nkain1	67149	4	low	4
Aplp2	11804	4	low	2
Cd151	12476	5	medium	4
Calu	12321	5	medium	0
Gm44	212952	5	medium	0
Sumf1	58911	6	medium	0
Them5	66198	6	medium	0
2310001A20Rik	71881	6	medium	1
Tspan6	56496	7	medium	4
S1pr2	14739	7	medium	7
Rcn3	52377	7	medium	0
Efnb1	13641	9	medium	1
Spint2	20733	9	medium	1
Tmed9	67511	10	medium	1
Tor3a	30935	19	high	0
Lrpap1	16976	20	high	1
H1f0	14958	25	high	0
Lman2	66890	32	high	1
Agrn	11603	36	high	0

## Sheet: 2 N-glycans
gene symble	gene ID	total spectra counts	quantity grade	TMHMM-TM-mouse
Fsip2	241516	1.5	low	0
Atrn	11990	1	low	1
Gpr125	70693	2	low	7
Lama4	16775	3	low	0
Itga11	319480	1	low	1
Tanc2	77097	1.5	low	0
Ceacam2	26367	3.5	low	1
Cacna2d1	12293	5.5	medium	0
Wapal	218914	1	low	0
Lphn2	99633	5	medium	0
Egfr	13649	5.5	medium	2
Jag1	16449	3	low	1
Tek	21687	4	low	2
Prtg	235472	8.5	medium	1
2610507B11Rik	72503	1	low	1
Ptprg	19270	2	low	1
Pvr	52118	12	medium	1
Sulf1	240725	1	low	0
Tdrd6	210510	1	low	0
Podxl	27205	2	low	1
Robo4	74144	7.5	medium	0
Ece1	230857	10.5	medium	1
Acp2	11432	11	medium	2
Ncam1	17967	22	high	2
Cdh2	12558	1	low	1
Pxdn	69675	1.5	low	1
Il17rd	171463	8	medium	0
Fgfr1	14182	12	medium	1
Dpp4	13482	16	high	1
Adam23	23792	1	low	1
Npr1	18160	1	low	0
Tyro3	22174	1.5	low	2
Lrp4	228357	3	low	1
Csf2ra	12982	3.5	low	1
Alcam	11658	9	medium	1
Slc5a9	230612	1	low	14
Pcdhgc3	93706	1	low	1
Pcdhga11	93723	1	low	2
Pvrl1	58235	1.5	low	2
Ggt1	14598	4	low	1
Slc15a1	56643	4.5	medium	11
Frrs1	20321	5	medium	6
Cln5	211286	6	medium	0
Adcy8	11514	6.5	medium	10
Susd2	71733	34	high	1
Atp1a1	11928	1	low	10
Syngap1	240057	1	low	0
Scube3	268935	1	low	0
Lgr4	107515	1.5	low	7
Crlf1	12931	1.5	low	0
0610007L01Rik	71667	1.5	low	3
1810055G02Rik	72056	1.5	low	1
Tm2d3	68634	2.5	low	1
Dag1	13138	7.5	medium	1
Mcam	84004	15	high	1
St14	19143	19.5	high	1
Dsg2	13511	20.5	high	1
Raet1b	19369	2	low	1
Sel1l	20338	2.5	low	0
Asah1	11886	2.5	low	0
Calcr	12311	3.5	low	8
Sema7a	20361	3.5	low	1
Ggh	14590	4	low	0
0610007C21Rik	381629	4.5	medium	1
Smpdl3b	100340	5.5	medium	0
P2rx7	18439	8	medium	0
Slc39a14	213053	13.5	high	7
Jam2	67374	16	high	1
Gba	14466	30.5	high	0
Fgfrl1	116701	1	low	1
Pcdhgb7	93704	1	low	1
Msln	56047	1.5	low	0
Gusb	110006	1.5	low	1
Pcdhgb8	93705	1.5	low	1
Grn	14824	2	low	0
Mfge8	17304	3	low	0
Car12	76459	3.5	low	1
Tm2d1	94043	5.5	medium	2
Lypla3	192654	7.5	medium	1
Adam10	11487	8	medium	1
Thbs1	21825	11	medium	0
Nt5e	23959	13	high	1
Cd63	12512	17.5	high	4
Slc44a2	68682	44	high	10
Slc12a9	83704	1.5	low	11
Lmln	239833	2.5	low	1
Naga	17939	2.5	low	0
1110036O03Rik	66180	2.5	low	0
Rab23	19335	2.5	low	0
Tspan31	67125	3	low	4
Tlr2	24088	3	low	1
Hgsnat	52120	3.5	low	12
Tmem132a	98170	3.5	low	1
Nol5a	67134	3.5	low	0
Casc4	319996	6.5	medium	1
Plod1	18822	10.5	medium	0
Mpzl1	68481	11.5	medium	2
Plod3	26433	13.5	high	0
Col18a1	12822	20	high	0
Atp1b1	11931	20.5	high	1
Car4	12351	1.5	low	0
Jam3	83964	2	low	1
Pttg1ip	108705	6	medium	2
Ssr1	107513	7	medium	1
AU018091	245128	15	high	13
Ctsa	19025	35	high	0
Atp1b3	11933	43	high	1
F11r	16456	49.5	high	1
Tacstd1	17075	61	high	1

## Sheet: 3 N-glycans
gene symble	gene ID	total spectra counts	quantity grade	TMHMM-TM-mouse
Fat2	245827	1	low	1
Dst	13518	1.33333	low	0
Vps13a	271564	1.33333	low	0
Gpr116	224792	1.33333	low	7
Syne1	64009	3.66667	low	1
Cpd	12874	2	low	1
Dchs1	233651	1.66667	low	1
2610207I05Rik	233789	2	low	0
Man2b1	17159	2	low	0
Ostm1	14628	2.66667	low	1
Erbb3	13867	4	low	1
Nope	56741	2	low	0
Igsf3	78908	7.66667	medium	1
Dpp6	13483	1	low	1
Prom2	192212	2.33333	low	5
Enpp4	224794	3.33333	low	1
Cdh13	12554	4.66667	medium	0
Sema4b	20352	6.66667	medium	2
0610031J06Rik	56700	35.3333	high	1
Sema4d	20354	5.33333	medium	1
Atp6ap1	54411	8	medium	2
Plxnb1	235611	13	high	0
Cd97	26364	19.6667	high	7
Pltp	18830	4	low	0
Nomo1	211548	4.66667	medium	0
Itfg3	106581	6.33333	medium	1
Plaur	18793	12.3333	high	1
Vasn	246154	1.33333	low	1
Plod2	26432	6.66667	medium	0
Hsp90b1	22027	9.3	medium	0
Fkbp10	14230	13	high	0
Slc39a6	106957	15.6667	high	6
Mme	17380	63	high	1
Casd1	213819	1.33333	low	12
Raet1a	19368	5.7	medium	1
Hyal2	15587	18	high	0
Epha1	13835	2	low	1
Pgap1	241062	3.33333	low	6
F3	14066	12.3333	high	2
Fkbp9	27055	12.6667	high	1
Cntfr	12804	13	high	0
Bsg	12215	16.6667	high	1
Igsf8	140559	25	high	1
Psap	19156	29.6667	high	0
Man2a1	17158	2	low	1
Pvrl2	19294	10.3333	medium	1
Pcyox1	66881	11	medium	1

## Sheet: 4 N-glycans
gene symble	gene ID	total spectra counts	quantity grade	TMHMM-TM-mouse
Celsr2	53883	2	low	7
Mrc2	17534	5	medium	1
Itgav	16410	14	high	1
Gns	75612	4.5	medium	1
Scarb1	20778	1.5	low	2
Fn1	14268	18.5	high	0
Ptgfrn	19221	10.5	medium	1
Pcdh1	75599	2.5	low	1
P2rx4	18438	2.75	low	2
Itga6	16403	53.5	high	1
Txndc15	69672	3	low	1
Gaa	14387	7.5	medium	1
Nptn	20320	35	high	1
Slc3a2	17254	51	high	1
Sort1	20661	6.75	medium	1
Hspa8	15481	12	medium	0
Glg1	20340	5.25	medium	1
M6pr	17113	23.25	high	1
Cd38	12494	20.75	high	1
Tfrc	22042	27.75	high	1
Cd276	102657	50	high	1

## Sheet: 5 N-glycans
gene symble	gene ID	total spectra counts	quantity grade	TMHMM-TM-mouse
Abca1	11303	3	low	13
Odz3	23965	6	medium	1
Odz4	23966	11.2	medium	1
Ly75	17076	17.8	high	1
Ptprk	19272	3.4	low	2
Lifr	16880	4.4	low	1
Ncstn	59287	8.2	medium	1
Plxna1	18844	15.2	high	1
Cdcp1	109332	1.6	low	1
Kit	16590	6.8	medium	2
Hspg2	15530	10.4	medium	0
Tpbg	21983	2	low	1
Atp1b2	11932	10.2	medium	1
Ptprf	19268	13.6	high	1
Emb	13723	110.2	high	1
Prom1	19126	8	medium	5
Ceacam1	26365	30.8	high	1
Alpl	11647	119.4	high	0
M6pr	17113	23.25	high	1
Cd38	12494	20.75	high	1
Tfrc	22042	27.75	high	1

## Sheet: 6 N-glycans
gene symble	gene ID	total spectra counts	quantity grade	TMHMM-TM-mouse
Insr	16337	7.16667	medium	2
Frem2	242022	7.83333	medium	2
Lnpep	240028	7	medium	1
Igf1r	16001	5	medium	1
Lamc1	226519	25.5	high	0
Itga9	104099	5	medium	2
Slc39a10	227059	4.83333	medium	7
Hyou1	12282	17.8333	high	1
Enpp3	209558	50.6667	high	1

## Sheet: 7 N-glycans
gene symble	gene ID	total spectra counts	quantity grade	TMHMM-TM-mouse
Itga1	109700	5.14286	medium	2
Sirpa	19261	3	low	1
Itga5	16402	27.8571	high	1
Scarb2	12492	19.4286	high	2
Ptk7	71461	24.5714	high	1
Cadm1	54725	20	high	1
Pecam1	18613	23.2857	high	1

## Sheet: 8 N-glycans
gene symble	gene ID	total spectra counts	quantity grade	TMHMM-TM-mouse
Sorl1	20660	3	low	2
Npc1	18145	8	medium	12
Anpep	16790	19	high	1
Colec12	140792	4	low	1
Itga3	16400	23	high	2
Lamb1-1	16777	14	high	0
Icam1	15894	25.3	high	1

## Sheet: > 8 N-glycans
gene symble	gene ID	total spectra counts	quantity grade	TMHMM-TM-mouse
Lrp2	14725	12.6667	high	2
Lama1	16772	3.625	low	1
Lama5	16776	13.3077	high	0
Igf2r	16004	15.1818	high	1
Lamp1	16783	53.0909	high	1
Lrp1	16971	5.63636	medium	1
Tmem2	83921	14.4545	high	1
Fat1	14107	5.7	medium	1
Itgb1	16412	38.4	high	1
Ptprj	19271	3	low	1
Lamp2	16784	17	high	1
Plxnb2	140570	19.6667	high	0
